# Supplementary material
Source: publisher figshare collection journal article supplement (https://acs.figshare.com/ndownloader/files/4648177)
Supplement: Supplementary file 1 [file 4648177]

## Supporting Information

### Decoupling Optical Properties in Metallo-Supramolecular Poly(*p*-phenylene ethynylene)s

Mark Burnworth, James D. Mendez, Michael Schroeter,

Stuart J. Rowan,<sup>\*</sup> and Christoph Weder<sup>\*</sup>

*Contribution from the Department of Macromolecular Science and Engineering, Case Western Reserve University, 2100 Adelbert Road, Cleveland, Ohio 44106-7202, USA*

#### Table of Contents

**S1.** <sup>1</sup>H NMR spectrum of **1**.

**S2.** UV-Vis absorption spectra of thin films of **1**, Zn<sup>2+</sup>:**1** and Fe<sup>2+</sup>:**1**.

**S3.** Thickness dependence of PL Emission spectra of **1** and Zn<sup>2+</sup>:**1**

**S4.** Thermal and processing dependence on PL emission spectra of **1**.

**S5.** Pictures of Zn<sup>2+</sup>:**1** under ambient illumination and under UV light.

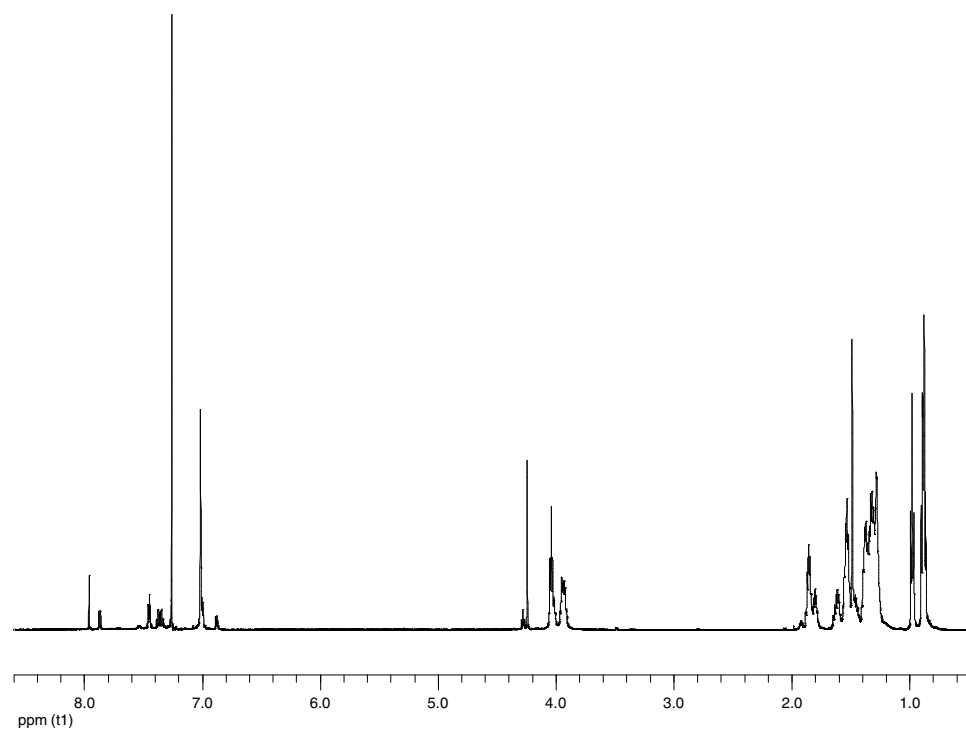

**Figure S1.** 600 MHz  $^1\text{H}$  NMR spectrum of macromonomer **1** in  $\text{CDCl}_3$ .

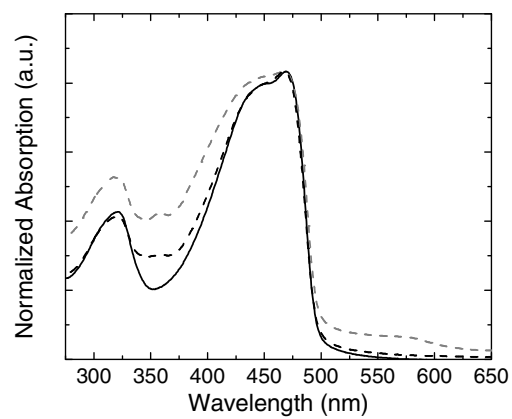

**Figure S2.** Normalized UV-Vis absorption spectra of spin-coated thin solid films: neat macromonomer **1** (black solid line),  $[1 \cdot \text{Zn}(\text{ClO}_4)_2]_n$  (black dashed line),  $[1 \cdot \text{Fe}(\text{ClO}_4)_2]_n$  (gray dashed line).

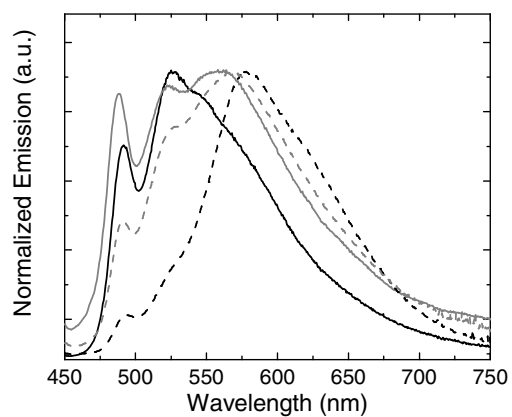

**Figure S3.** Normalized PL emission spectra of spin-coated thin solid films: neat macromonomer **1** thickness = 2  $\mu\text{m}$  (black solid); neat macromonomer **1** thickness = 3.5  $\mu\text{m}$  (black dot);  $[\mathbf{1} \cdot \text{Zn}(\text{ClO}_4)_2]_n$  thickness = 1.8  $\mu\text{m}$  (gray solid);  $[\mathbf{1} \cdot \text{Zn}(\text{ClO}_4)_2]_n$  thickness = 3.5  $\mu\text{m}$  (gray dot).

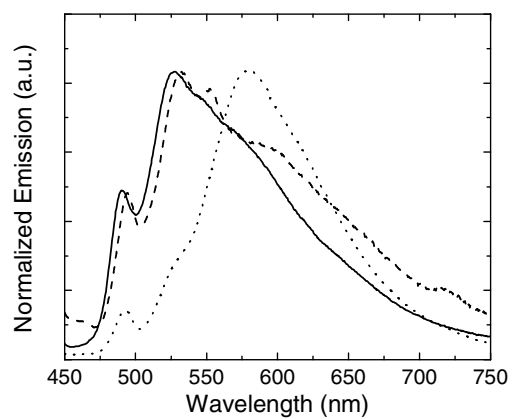

**Figure S4.** Normalized emission spectra of spin-coated thin films of the neat macromonomer **1** of a thickness of 3.5  $\mu\text{m}$  (solid line), and after annealing for 24 hours (dashed line), and a solution cast film of **1** of a thickness of 9  $\mu\text{m}$  (dotted line).

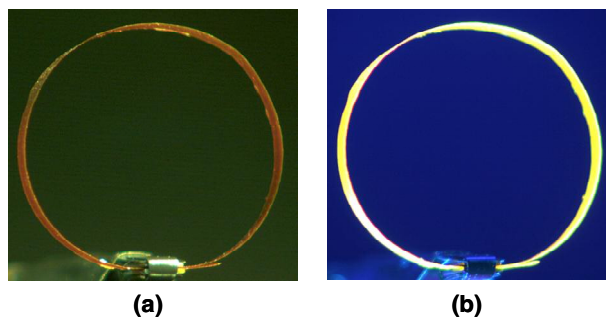

**Figure S5.** Pictures of a solution-cast film of  $[1 \cdot \text{Zn}(\text{ClO}_4)_2]_n$  under ambient illumination (a) and excitation with 365 nm UV light (b).
